# Supplementary material for: Effect of Fish Oil Supplementation on Hepatic and Visceral Fat in Overweight Men: A Randomized Controlled Trial
Source: MDPI journal article supplement (doi:10.3390/nu11020475), 2019-02-23
Supplement: s1 [file s1]

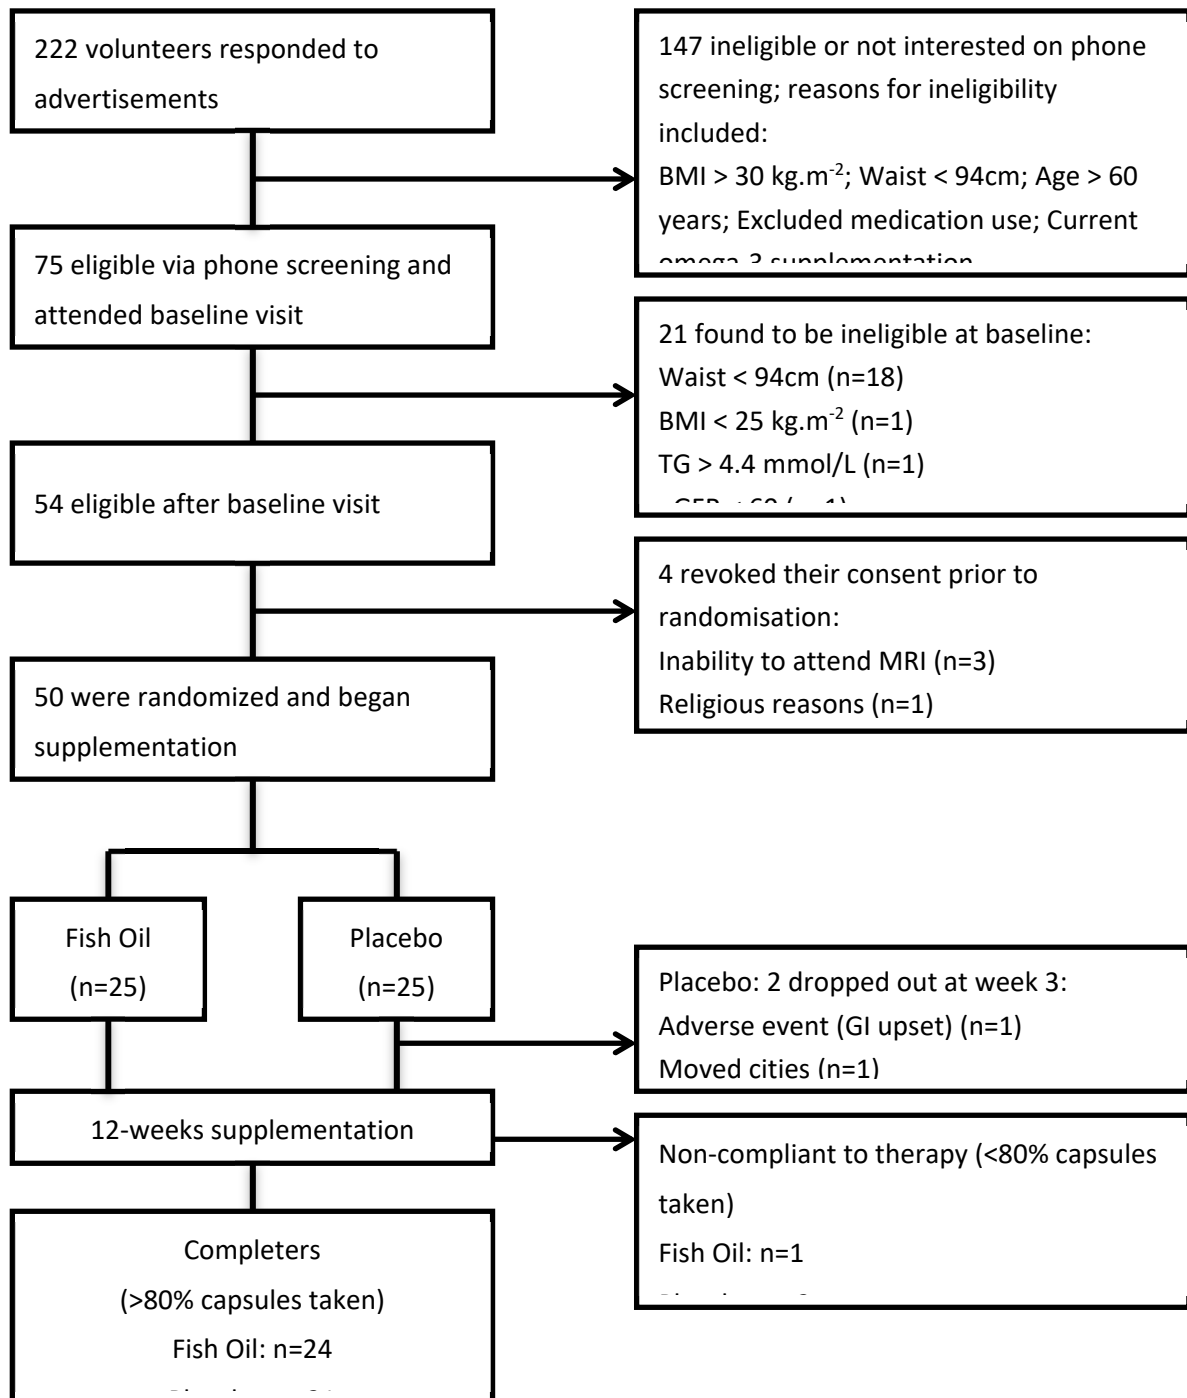

**Figure S1.** Flow diagram of volunteer recruitment and study participation. Final analyses were conducted as intention to treat, and included all participants who initiated supplementation regardless of compliance to therapy. Group means imputed for drop-outs and missing data (see Methods for details).

**Table S1.** Anthropometric, hepatic, abdominal fat and biochemical outcomes during 12 weeks supplementation with Fish Oil or Placebo.

|                                       | Placebo       |               | Fish Oil      |               | P (t)  | P (g) | P (g × t) <sup>1</sup> |
|---------------------------------------|---------------|---------------|---------------|---------------|--------|-------|------------------------|
|                                       | Week 6        | Week 12       | Week 6        | Week 12       |        |       |                        |
| <b><i>Anthropometry</i></b>           |               |               |               |               |        |       |                        |
| Weight (kg)                           | 92.6 (2.1)    | 92.7 (2.1)    | 89.1 (1.6)    | 88.9 (1.7)    | 0.936  | 0.185 | 0.405                  |
| Waist (cm)                            | 101.3 (1.1)   | 100.9 (1.2)   | 99.6 (1.2)    | 99.0 (1.3)    | 0.424  | 0.343 | 0.527                  |
| BMI (kg.m <sup>2</sup> )              | 28.0 (0.3)    | 28.0 (0.3)    | 27.7 (0.3)    | 27.6 (0.3)    | 0.870  | 0.489 | 0.425                  |
| <b><i>Liver fat and adiposity</i></b> |               |               |               |               |        |       |                        |
| IHL (%)                               | 6.2 (1.2)     | 5.8 (1.2)     | 3.8 (0.5)     | 3.5 (0.5)     | 0.475  | 0.061 | 0.542                  |
| Hepatic SI                            | 0.950 (0.006) | 0.953 (0.005) | 0.938 (0.010) | 0.942 (0.009) | 0.610  | 0.406 | 0.594                  |
| SAT, umbilicus (cm <sup>3</sup> )     | 287.3 (12.3)  | 285.8 (13.1)  | 270.6 (13.2)  | 270.9 (13.5)  | 0.900  | 0.423 | 0.717                  |
| VAT, umbilicus (cm <sup>3</sup> )     | 102.7 (12.5)  | 100.2 (11.3)  | 96.8 (10.1)   | 101.6 (9.9)   | 0.476  | 0.901 | 0.503                  |
| SAT, total (L)                        | 6.24 (0.28)   | 6.24 (0.29)   | 6.00 (0.26)   | 6.00 (0.26)   | 0.854  | 0.722 | 0.672                  |
| VAT, total (L)                        | 3.34 (0.31)   | 3.28 (0.30)   | 3.04 (0.26)   | 3.08 (0.28)   | 0.359  | 0.729 | 0.474                  |
| Body fat, BIA (%)                     | 22.9 (0.6)    | 22.8 (0.7)    | 22.6 (0.5)    | 22.9 (0.6)    | 0.528  | 0.921 | 0.349                  |
| <b><i>Liver function tests</i></b>    |               |               |               |               |        |       |                        |
| ALT (U/L)                             | 32.4 (2.3)    | 30.9 (2.1)    | 36.4 (2.7)    | 38.4 (4.2)    | 0.975  | 0.262 | 0.119                  |
| AST (U/L)                             | 25.7 (1.0)    | 24.3 (0.8)    | 31.3 (3.3)    | 29.9 (1.7)    | 0.611  | 0.021 | 0.899                  |
| GGT (U/L)                             | 30.3 (2.8)    | 29.2 (2.8)    | 30.1 (3.4)    | 32.2 (3.9)    | 0.880  | 0.962 | 0.224                  |
| <b><i>Other biochemistry</i></b>      |               |               |               |               |        |       |                        |
| Triglycerides (mmol/L)                | 1.5 (0.1)     | 1.5 (0.1)     | 1.2 (0.1)     | 1.1 (0.1)     | 0.739  | 0.006 | 0.450                  |
| Omega-3 Index                         | 8.4 (1.7)     | 8.3 (1.5)     | 9.6 (1.7)     | 10.6 (2.4)    | <0.001 | 0.013 | <0.001                 |

Data are presented as mean ± SE. <sup>1</sup> P-values for group (g), time (t), and group × time (g × t) interactions. Abbreviations: ALT, alanine aminotransferase; AST, aspartate aminotransferase; BIA, bioelectrical impedance analysis; GGT, gamma-glutamyl aminotransferase; IHL, intrahepatic lipid; SAT, abdominal subcutaneous adipose tissue; SI, saturation index; VAT, visceral adipose tissue. See Table 1 for baseline measures and laboratory reference ranges.

**Table S2.** Self-reported dietary intake and energy expenditure.

|                                  | Placebo |        |        | Fish Oil |        |        | <i>P</i>     | <i>P</i>         |
|----------------------------------|---------|--------|--------|----------|--------|--------|--------------|------------------|
|                                  | Week    | Week   | Week   | Week     | Week   | Week   | ( <i>t</i> ) | ( <i>g x t</i> ) |
|                                  | 0       | 6      | 12     | 0        | 6      | 12     |              |                  |
| <b><i>Energy Intake</i></b>      |         |        |        |          |        |        |              |                  |
| Fat (g/day)                      | 90.0    | 89.2   | 91.7   | 96.0     | 90.2   | 89.8   | 0.771        | 0.697            |
|                                  | (7.3)   | (5.3)  | (4.3)  | (7.0)    | (5.2)  | (6.6)  |              |                  |
| % Energy intake                  | 30.3    | 32.1   | 33.1   | 33.0     | 32.8   | 32.9   | 0.338        | 0.232            |
|                                  | (1.1)   | (1.1)  | (1.1)  | (1.2)    | (1.0)  | (1.2)  |              |                  |
| - SFA (g/day)                    | 34.2    | 35.1   | 36.6   | 39.0     | 35.9   | 34.2   | 0.812        | 0.227            |
|                                  | (3.1)   | (2.6)  | (2.1)  | (3.6)    | (2.6)  | (3.1)  |              |                  |
| - SFA (%fat intake)              | 41.0    | 42.3   | 43.7   | 43.0     | 42.9   | 41.1   | 0.822        | 0.065            |
|                                  | (1.3)   | (1.5)  | (1.8)  | (1.5)    | (1.5)  | (1.4)  |              |                  |
| - MUFA (g/day)                   | 34.6    | 33.4   | 34.0   | 35.5     | 34.2   | 36.3   | 0.771        | 0.916            |
|                                  | (3.3)   | (2.2)  | (2.1)  | (2.6)    | (2.3)  | (2.9)  |              |                  |
| - MUFA (%fat intake)             | 40.5    | 39.8   | 38.9   | 38.9     | 40.2   | 42.6   | 0.496        | <b>0.018</b>     |
|                                  | (1.10)  | (1.0)  | (1.1)  | (1.0)    | (1.1)  | (1.0)  |              |                  |
| - PUFA (g/day)                   | 14.8    | 14.4   | 14.9   | 14.7     | 13.7   | 12.9   | 0.571        | 0.554            |
|                                  | (1.4)   | (1.4)  | (1.3)  | (1.1)    | (1.0)  | (1.0)  |              |                  |
| - PUFA (%fat intake)             | 18.3    | 17.8   | 17.4   | 17.6     | 16.9   | 16.3   | 0.317        | 0.974            |
|                                  | (1.2)   | (1.2)  | (1.2)  | (1.3)    | (1.5)  | (1.)   |              |                  |
| Carbohydrate (g/day)             | 287.6   | 268.6  | 261.6  | 267.8    | 248.1  | 247.1  | 0.095        | 0.959            |
|                                  | (21.1)  | (16.3) | (18.3) | (14.5)   | (16.5) | (11.7) |              |                  |
| % Energy intake                  | 43.9    | 42.8   | 41.4   | 42.2     | 40.7   | 42.4   | 0.317        | 0.183            |
|                                  | (1.4)   | (1.5)  | (1.7)  | (1.4)    | (1.2)  | (1.3)  |              |                  |
| - Sugar (g/day)                  | 127.3   | 104.8  | 115.0  | 112.2    | 101.9  | 101.6  | <b>0.049</b> | 0.623            |
|                                  | (13.1)  | (9.6)  | (13.7) | (10.2)   | (10.9) | (7.8)  |              |                  |
| Protein (g/day)                  | 114.8   | 110.6  | 108.2  | 108.2    | 118.8  | 104.4  | 0.434        | 0.486            |
|                                  | (5.9)   | (5.9)  | (4.3)  | (6.0)    | (12.0) | (4.7)  |              |                  |
| % Energy intake                  | 19.3    | 18.8   | 19.0   | 18.1     | 18.8   | 18.7   | 0.962        | 0.611            |
|                                  | (1.0)   | (0.9)  | (1.0)  | (0.7)    | (0.7)  | (0.7)  |              |                  |
| Total energy intake (MJ/day)     | 10.6    | 10.1   | 10.0   | 10.4     | 10.0   | 9.4    | 0.295        | 0.876            |
|                                  | (0.7)   | (0.5)  | (0.5)  | (0.5)    | (0.5)  | (0.4)  |              |                  |
| <b><i>Energy Expenditure</i></b> |         |        |        |          |        |        |              |                  |
| Self-reported EE (kcal/kg/day)   | 45.4    | 43.8   | 43.2   | 41.8     | 41.3   | 42.0   | 0.151        | 0.172            |
|                                  | (1.9)   | (1.7)  | (1.8)  | (0.9)    | (0.7)  | (1.0)  |              |                  |
| Total self-reported EE (MJ/day)  | 17.6    | 17.1   | 16.8   | 15.6     | 15.4   | 15.6   | 0.164        | 0.269            |
|                                  | (1.0)   | (1.0)  | (1.0)  | (0.5)    | (0.4)  | (0.5)  |              |                  |
| Total measured EE (MJ/day)       | 13.5    | 13.2   | 13.4   | 13.3     | 13.6   | 13.2   | 0.781        | 0.313            |
|                                  | (0.3)   | (0.3)  | (0.2)  | (0.4)    | (0.4)  | (0.4)  |              |                  |
| Steps per day                    | 11068   | 10395  | 10180  | 9581     | 9094   | 9438   | 0.379        | 0.696            |
|                                  | (839)   | (813)  | (901)  | (582)    | (477)  | (694)  |              |                  |

|                       |                 |                 |                 |                 |                 |                 |              |       |
|-----------------------|-----------------|-----------------|-----------------|-----------------|-----------------|-----------------|--------------|-------|
| Average METs          | 1.51<br>(0.03)  | 1.48<br>(0.03)  | 1.52<br>(0.03)  | 1.50<br>(0.03)  | 1.54<br>(0.03)  | 1.51<br>(0.03)  | 0.965        | 0.264 |
| Lying down (hr:min)   | 8:07<br>(0:18)  | 8:19<br>(0:17)  | 8:09<br>(0:15)  | 7:51<br>(0:11)  | 7:49<br>(0:13)  | 7:59<br>(0:12)  | 0.855        | 0.676 |
| Sleep (hr:min)        | 6:30<br>(0:17)  | 6:46<br>(0:14)  | 6:43<br>(0:14)  | 6:33<br>(0:11)  | 6:26<br>(0:13)  | 6:41<br>(0:10)  | 0.554        | 0.456 |
| Time on body (hr:min) | 23:23<br>(0:07) | 23:14<br>(0:08) | 23:13<br>(0:10) | 23:31<br>(0:06) | 23:21<br>(0:10) | 23:13<br>(0:06) | <b>0.026</b> | 0.702 |

---

Data presented as mean (SE), statistically significant results in **bold**. Abbreviations: *t*, time; *g x t*, group x time; SFA, saturated fatty acids; EE, energy expenditure; METs, metabolic equivalents; MUFA, monounsaturated fatty acids; PUFA, polyunsaturated fatty acids. Energy intake calculated from 3-day estimated food records, using FoodWorks™ software; self-reported energy expenditure calculated from Bouchard activity questionnaire [32]; measured energy expenditure (including steps per day, METs, lying down and sleep) calculated from 3-day activity recording using SenseWear™ triaxial accelerometer.
